# Supplementary material
Source: PubMed Central journal article supplement (PMC4135177)
Supplement: 1400742_JI_1400742_Supplemental_Figure_1.pdf [file 1400742_JI_1400742_Supplemental_Figure_1.pdf]

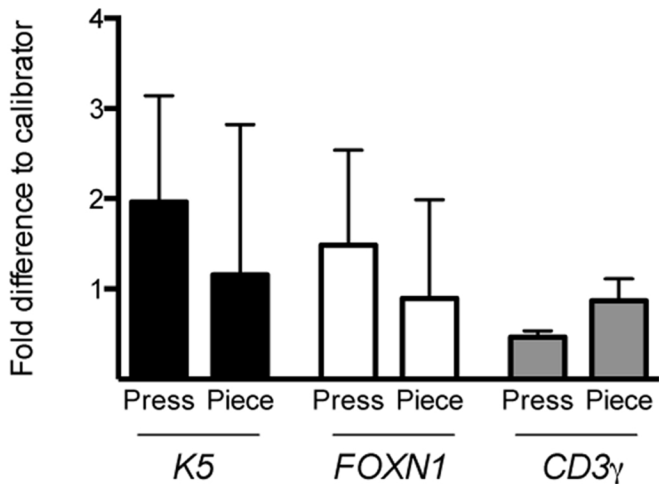

**Figure S1.**

Isolated RNA from pieces of pressed + flushed or untreated tissue analyzed by RT-qPCR for *FOXN1*, *K5* and *CD3γ* (n=4). Enrichment of epithelial cell markers *FOXN1* and *K5* and lowering of *CD3γ* expression is seen in pressed thymic tissues. *GAPDH* was used as endogenous control. Each marker is presented as median with interquartile range.
